# Supplementary material for: Renin-Angiotensin System Gene Variants and Type 2 Diabetes Mellitus: Influence of Angiotensinogen
Source: Hindawi journal article supplement (doi:10.1155/2016/2161376), 2015-11-22
Supplement: f1 [file 2161376.f1.pdf]

## Supplementary information

Supplementary Table 1: Allele and genotype frequencies of SNPs and their association status with diabetes

| SNPs                    | Allele Frequency         |                          | Association |                       |
|-------------------------|--------------------------|--------------------------|-------------|-----------------------|
|                         | Control                  | DM                       | p-value     | OR (95% CI)           |
| ACE<br>Ins/Del          | Ins = 0.74<br>Del = 0.26 | Ins = 0.77<br>Del = 0.23 | 0.240       | 0.842 (0.642 - 1.104) |
| ACE<br>rs4459609 (A>C)  | A = 0.74<br>C = 0.26     | A = 0.76<br>C = 0.24     | 0.333       | 0.866 (0.661 - 1.136) |
| ACE<br>rs1800764 (T>C)  | T = 0.72<br>C = 0.28     | T = 0.77<br>C = 0.23     | 0.05        | 0.758 (0.578 - 0.994) |
| ACE<br>rs4344 (G>A)     | G = 0.26<br>A = 0.74     | G = 0.23<br>A = 0.77     | 0.369       | 1.143 (0.871 - 1.500) |
| ACE<br>rs4359 (C>T)     | C = 0.71<br>T = 0.29     | C = 0.76<br>T = 0.24     | 0.070       | 0.774 (0.593 - 1.011) |
| ACE<br>rs4363 (G>A)     | G = 0.28<br>A = 0.72     | G = 0.25<br>A = 0.75     | 0.204       | 1.199 (0.919 - 1.565) |
| AGT<br>rs699 (T>C)      | T = 0.15<br>C = 0.85     | T = 0.18<br>C = 0.82     | 0.127       | 0.771 (0.561 - 1.059) |
| AGT<br>rs4762 (C>T)     | C = 0.87<br>T = 0.13     | C = 0.88<br>T = 0.12     | 0.646       | 0.906 (0.637 - 1.289) |
| AGT<br>rs5051 (A>G)     | A = 0.85<br>G = 0.15     | A = 0.82<br>G = 0.18     | 0.196       | 1.249 (0.909 - 1.717) |
| AGTR1<br>rs388915 (T>C) | T = 0.86<br>C = 0.14     | T = 0.84<br>C = 0.16     | 0.406       | 1.167 (0.838 - 1.626) |

Supplementary Table 2: Association of SNPs with diabetes in the male gender

| SNP                  | Allele Frequency |            | Unadjusted<br>p-value | Adjusted<br>p-value <sup>a</sup> | Adjusted OR <sup>a</sup> (95% CI) |
|----------------------|------------------|------------|-----------------------|----------------------------------|-----------------------------------|
|                      | Control          | DM         |                       |                                  |                                   |
| ACE Ins/Del          |                  |            |                       |                                  |                                   |
| Ins                  | Ins = 0.75       | Ins = 0.79 | 1                     |                                  | Reference                         |
| Del                  | Del = 0.25       | Del = 0.21 | 0.289                 | 0.583                            | 0.877 (0.549 – 1.401)             |
| Ins/Ins              |                  |            | 1                     |                                  | Reference                         |
| Ins/Del              |                  |            | 0.182                 | 0.370                            | 0.765 (0.425 – 1.375)             |
| Del/Del              |                  |            | 0.674                 | 0.916                            | 1.071 (0.302 – 3.798)             |
| ACE rs4459609 (A>C)  |                  |            |                       |                                  |                                   |
| A                    | A = 0.75         | A = 0.76   | 1                     |                                  | Reference                         |
| C                    | C = 0.25         | C = 0.24   | 0.752                 | 0.833                            | 1.052 (0.659 – 1.678)             |
| AA                   |                  |            | 1                     |                                  | Reference                         |
| AC                   |                  |            | 0.780                 | 0.413                            | 1.277 (0.711 – 2.293)             |
| CC                   |                  |            | 0.332                 | 0.566                            | 0.687 (0.191 – 2.473)             |
| ACE rs1800764 (T>C)  |                  |            |                       |                                  |                                   |
| T                    | T = 0.73         | T = 0.78   | 1                     |                                  | Reference                         |
| C                    | C = 0.27         | C = 0.22   | 0.280                 | 0.565                            | 0.871 (0.543 – 1.396)             |
| TT                   |                  |            | 1                     |                                  | Reference                         |
| CT                   |                  |            | 0.954                 | 0.698                            | 1.121 (0.629 – 2.000)             |
| CC                   |                  |            | 0.065                 | 0.158                            | 0.352 (0.082 – 1.501)             |
| ACE rs4344 (G>A)     |                  |            |                       |                                  |                                   |
| G                    | G = 0.25         | G = 0.21   | 0.289                 | 0.451                            | 1.196 (0.751 – 1.904)             |
| A                    | A = 0.75         | A = 0.79   | 1                     |                                  | Reference                         |
| GG                   |                  |            | 0.674                 | 0.861                            | 0.894 (0.256 – 3.126)             |
| AG                   |                  |            | 0.182                 | 0.343                            | 0.753 (0.419 – 1.354)             |
| *AA                  |                  |            | 1                     |                                  | Reference                         |
| ACE rs4359 (C>T)     |                  |            |                       |                                  |                                   |
| C                    | C = 0.71         | C = 0.79   | 1                     |                                  | Reference                         |
| T                    | T = 0.29         | T = 0.21   | 0.083                 | 0.165                            | 0.729 (0.467 – 1.139)             |
| CC                   |                  |            | 1                     |                                  | Reference                         |
| CT                   |                  |            | 0.197                 | 0.418                            | 0.784 (0.434 – 1.414)             |
| TT                   |                  |            | 0.141                 | 0.189                            | 0.468 (0.151 – 1.453)             |
| ACE rs4363 (G>A)     |                  |            |                       |                                  |                                   |
| G                    | G = 0.28         | G = 0.22   | 0.160                 | 0.308                            | 1.271 (0.802 – 2.017)             |
| A                    | A = 0.72         | A = 0.78   | 1                     |                                  | Reference                         |
| GG                   |                  |            | 0.440                 | 0.638                            | 0.745 (0.219 – 2.534)             |
| AG                   |                  |            | 0.119                 | 0.278                            | 0.725 (0.405 – 1.297)             |
| *AA                  |                  |            | 1                     |                                  | Reference                         |
| AGTR1 rs388915 (T>C) |                  |            |                       |                                  |                                   |
| T                    | T = 0.85         | T = 0.83   | 1                     |                                  | Reference                         |
| C                    | C = 0.15         | C = 0.17   | 0.516                 | 0.505                            | 1.196 (0.707 – 2.023)             |
| TT                   |                  |            | 1                     |                                  | Reference                         |
| CT                   |                  |            | 0.631                 | 0.700                            | 1.129 (0.609 – 2.095)             |
| CC                   |                  |            | 0.465                 | 0.504                            | 1.829 (0.311 – 10.749)            |

<sup>a</sup>Adjusted for waist circumference in a multiple logistic regression model

\*AA is used as reference because the frequency of A allele is higher

Supplementary Table 3: Comparison of various clinical and biochemical parameters between the *AGT* rs699 genotypes

| Characteristics                                         | AGT rs699, n=144 (Mean ± SD) |              |              | P-value            |
|---------------------------------------------------------|------------------------------|--------------|--------------|--------------------|
|                                                         | TT (n = 14)                  | CT (n = 158) | CC (n = 385) |                    |
| Age (years)                                             | 57.6 ± 5.5                   | 57.2 ± 6.4   | 57.2 ± 6.7   | 0.989              |
| BMI (kg/m <sup>2</sup> )                                | 25.9 ± 6.5                   | 27.3 ± 4.7   | 27.2 ± 4.8   | 0.593 <sup>a</sup> |
| Waist circumference (cm)                                | 85.3 ± 20.1                  | 89.4 ± 11.5  | 89.4 ± 12.6  | 0.481              |
| Waist-to-hip Ratio                                      | 0.9 ± 0.1                    | 0.9 ± 0.1    | 0.9 ± 0.1    | 0.906              |
| Systolic blood pressure (mmHg)                          | 126.8 ± 9.9                  | 135.0 ± 17.1 | 132.2 ± 15.6 | 0.103              |
| Diastolic blood pressure (mmHg)                         | 78.9 ± 6.5                   | 77.8 ± 9.1   | 78.4 ± 9.6   | 0.766              |
| Fasting blood glucose (mmol/l)                          | 5.7 ± 1.2                    | 7.5 ± 3.2    | 6.7 ± 2.5    | 0.005              |
| HbA1c (%)                                               | 6.2 ± 1.0                    | 7.6 ± 2.2    | 7.1 ± 2.3    | 0.012              |
| Serum urea (mmol/L)                                     | 5.9 ± 2.5                    | 6.4 ± 9.9    | 5.0 ± 1.8    | 0.107              |
| Serum creatinine (mmol/L)                               | 81.6 ± 17.4                  | 83.5 ± 30.4  | 83.1 ± 26.2  | 0.982              |
| Glomerular filtration rate (ml/min/1.72m <sup>2</sup> ) | 82.2 ± 16.2                  | 78.2 ± 26.2  | 81.6 ± 24.9  | 0.341 <sup>a</sup> |
| Serum triglyceride (mmol/l)                             | 1.3 ± 0.9                    | 2.1 ± 6.6    | 1.7 ± 0.9    | 0.113              |
| Serum cholesterol (mmol/l)                              | 4.6 ± 1.2                    | 5.1 ± 4.9    | 5.0 ± 2.7    | 0.505              |
| High density lipoprotein (mmol/l)                       | 1.3 ± 0.5                    | 1.3 ± 0.4    | 1.9 ± 8.4    | 0.588              |
| Low density lipoprotein (mmol/l)                        | 2.7 ± 1.0                    | 2.7 ± 1.1    | 2.8 ± 0.9    | 0.585              |

<sup>a</sup>P-values obtained using ANOVA, all other comparisons used Kruskal-Wallis test
